# Supplementary material for: Chelidonic Acid and Its Derivatives from Saussurea Controversa: Isolation, Structural Elucidation and Influence on the Osteogenic Differentiation of Multipotent Mesenchymal Stromal Cells In Vitro
Source: PubMed Central journal article supplement (PMC6572306; doi:10.3390/biom9050189), 2019-05-16
Supplement: biomolecules-09-00189-s001.pdf [file biomolecules-09-00189-s001.pdf]

## Chelidonic Acid and its Derivatives from *Saussurea Controversa*: Isolation, Structural elucidation and Influence on the Osteogenic Differentiation of Multipotent Mesenchymal Stromal Cells in Vitro

Elena Avdeeva <sup>1\*</sup>, Elvira Shults <sup>2,4</sup>, Tatyana Rybalova <sup>3,4</sup>, Yaroslav Reshetov <sup>1</sup>, Ekaterina Porokhova<sup>5</sup>, Irina Sukhodolo <sup>5</sup>, Larisa Litvinova <sup>6</sup>, Valeria Shupletsova <sup>6</sup>, Olga Khaziakhmatova <sup>6</sup>, Igor Khlusov <sup>5,7</sup>, Artem Guryev <sup>1</sup> and Mikhail Belousov <sup>1,7</sup>

<sup>1</sup> Department of Pharmaceutical Analysis, Siberian State Medical University, Tomsk, 634050 ,Russia; [ferroplex2013@yandex.ru](mailto:ferroplex2013@yandex.ru) (Y.R.); [titan-m@mail.ru](mailto:titan-m@mail.ru) (A.G.); [mvb63@mail.ru](mailto:mvb63@mail.ru) (M.B)

<sup>2</sup> Laboratory of Medicinal Chemistry, Novosibirsk Institute of Organic Chemistry, Siberian Branch, Novosibirsk, 630090, Russia; [schultz@nioch.nsc.ru](mailto:schultz@nioch.nsc.ru) (E.S.)

<sup>3</sup> Center of Spectral Investigations, Novosibirsk Institute of Organic Chemistry, Siberian Branch, Novosibirsk, 630090, Russia; [rybalova@nioch.nsc.ru](mailto:rybalova@nioch.nsc.ru) (T.R)

<sup>4</sup> Novosibirsk State University, 2 Pirogova St., Novosibirsk 630090, Russia

<sup>5</sup> Department of Morphology and General Pathology, Siberian State Medical University, Tomsk, 634050 ,Russia; [porohova\\_e@mail.ru](mailto:porohova_e@mail.ru) (E.P.); [staranie@mail.ru](mailto:staranie@mail.ru) (I.S.); [khlusov63@mail.ru](mailto:khlusov63@mail.ru) (I.K.)

<sup>6</sup> Basic Laboratory of Immunology and Cell Biotechnology, Immanuel Kant Baltic Federal University, Kaliningrad, 236041, Russia; [larisalitvinova@yandex.ru](mailto:larisalitvinova@yandex.ru) (L.L.); [yshupletsova@mail.ru](mailto:yshupletsova@mail.ru) (V.S.); [hazik36@mail.ru](mailto:hazik36@mail.ru) (O.K.)

<sup>7</sup> Research School of Chemistry & Applied Biomedical Sciences, Tomsk Polytechnic University, Tomsk, 634050, Russia

\* Correspondence: [elenaavdeev@yandex.ru](mailto:elenaavdeev@yandex.ru); Tel.: +7-983-344-7381 (E.A.)

### TABLE OF CONTENTS

|                                                                                                                                 |           |
|---------------------------------------------------------------------------------------------------------------------------------|-----------|
| <b>Figure 1S.</b> MS-spectrum of chelidonic acid (1)                                                                            | <b>S2</b> |
| <b>Figure 2S.</b> The chromatographic profile of chelidonic acid, 1 (A) and R3 (B)                                              | <b>S3</b> |
| <b>Figure 3S.</b> <sup>1</sup> H NMR (CD <sub>3</sub> OD, 600 MHz) of n-monobutyl ester of chelidonic acid (3)                  | <b>S4</b> |
| <b>Figure 4S.</b> <sup>13</sup> C NMR (CD <sub>3</sub> OD, 150 MHz) of n-monobutyl ester of chelidonic acid (3)                 | <b>S5</b> |
| <b>Figure 5S.</b> MS-spectrum of n-monobutyl ester of chelidonic acid (3)                                                       | <b>S6</b> |
| <b>Figure 6S.</b> IR-spectrum (KBr, cm <sup>-1</sup> ) of n-monobutyl ester of chelidonic acid (3)                              | <b>S7</b> |
| <b>Figure 7S.</b> IR-spectrum (KBr, cm <sup>-1</sup> ) of chelidonic acid (A) and [Ca(ChA)(H <sub>2</sub> O) <sub>3</sub> ] (B) | <b>S8</b> |

915-20\_180830170910 #6 RT: 0.31 AV: 1 NL: 6.03E5  
T: + c EI Full ms [ 14.50-200.50]

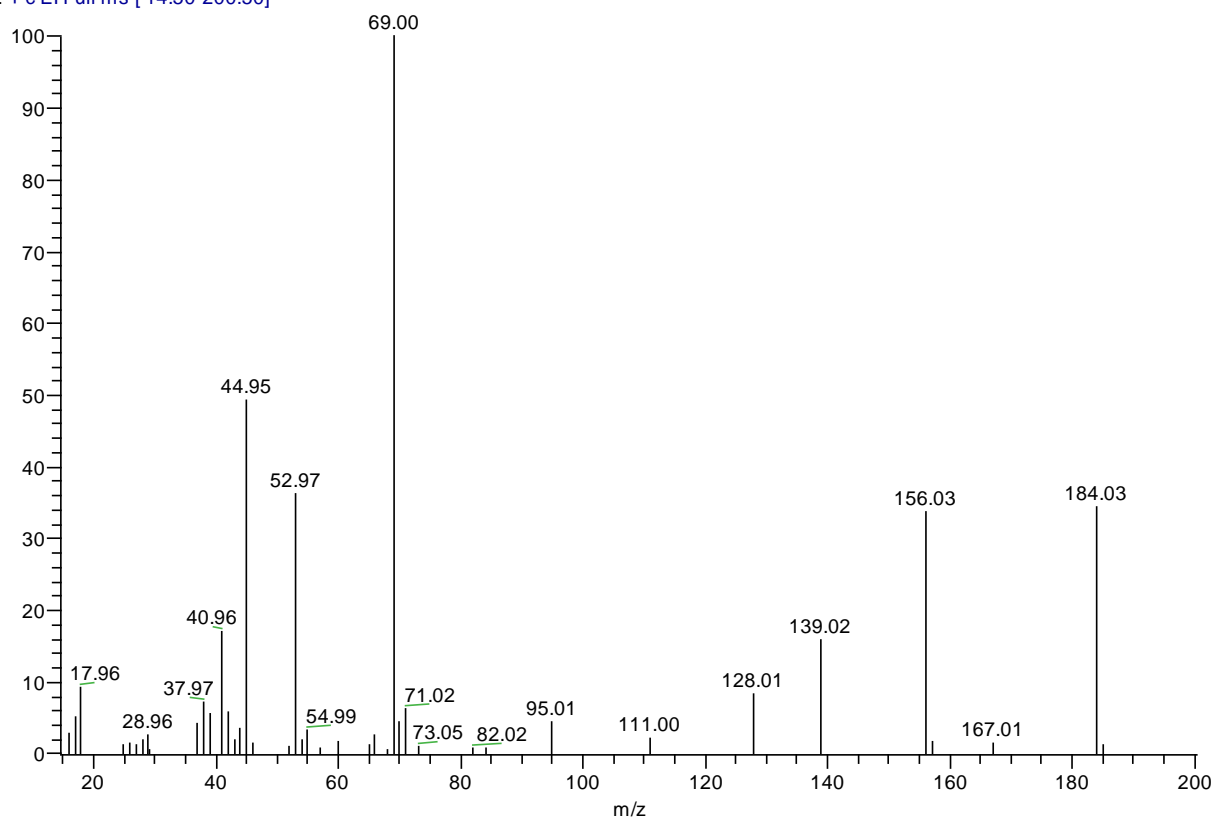

Figure 1S. MS-spectrum of chelidonic acid (1)

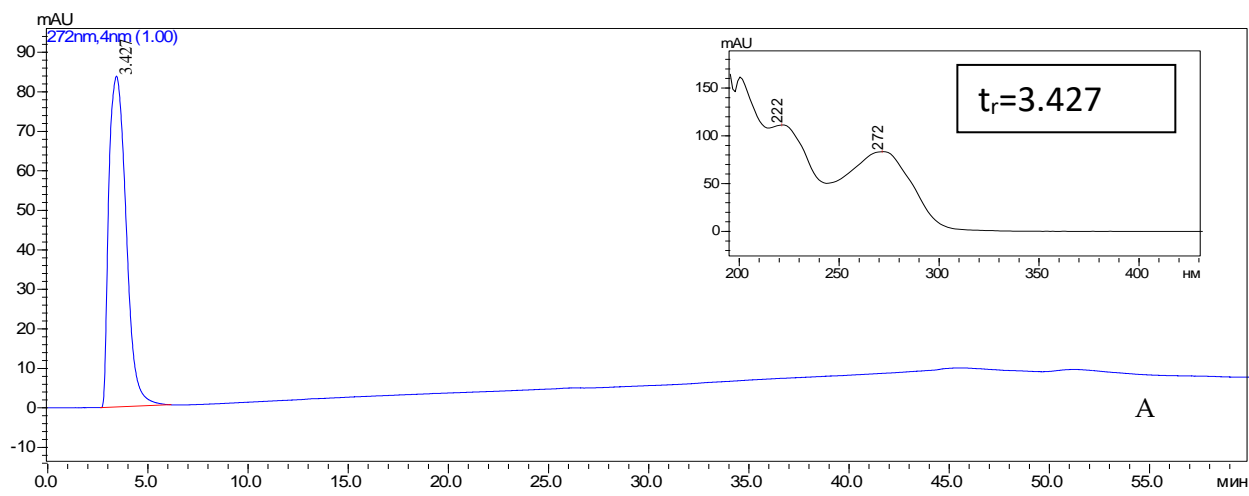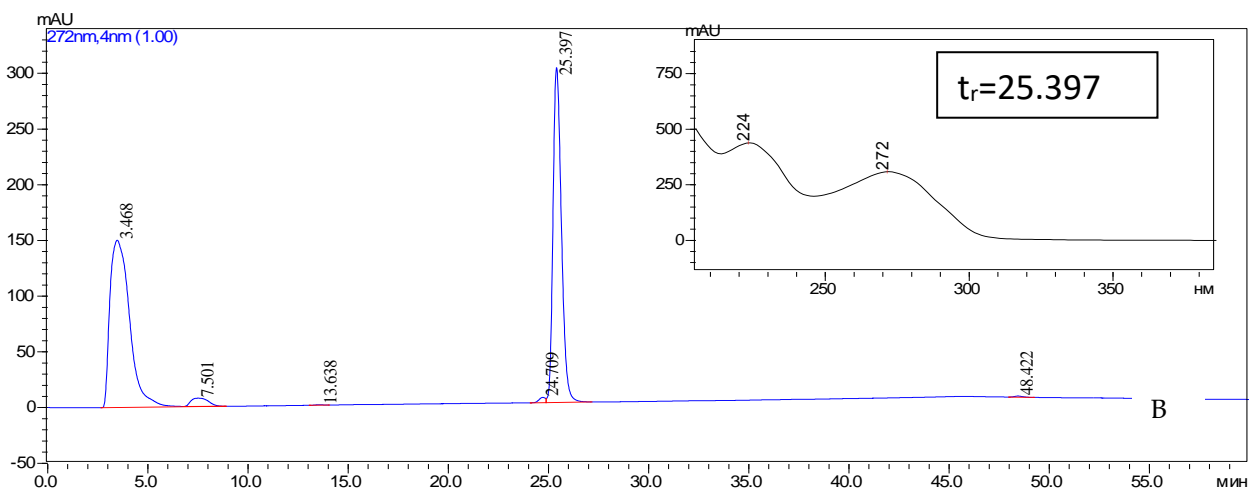

**Figure 2S.** The chromatographic profile of chelidonic acid, **1** (A) and R3 (B).

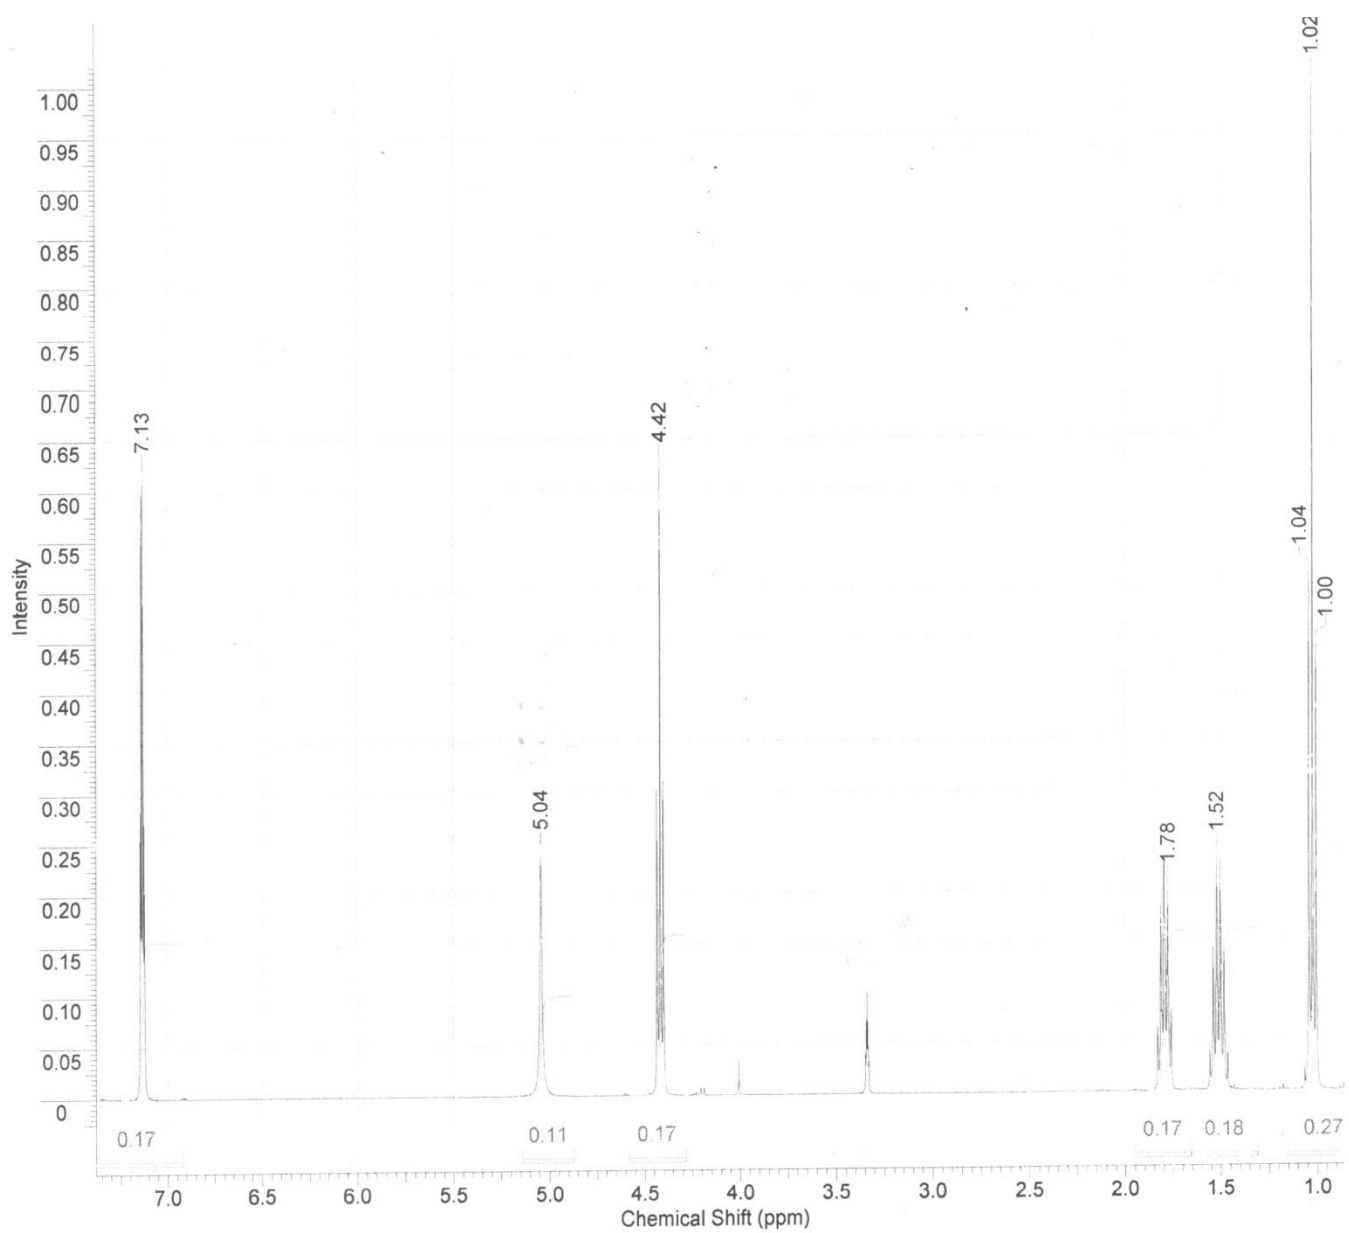

**Figure 3S.**  $^1\text{H}$  NMR ( $\text{CD}_3\text{OD}$ , 600 MHz) of n-monobutyl ester of chelidonic acid (3)

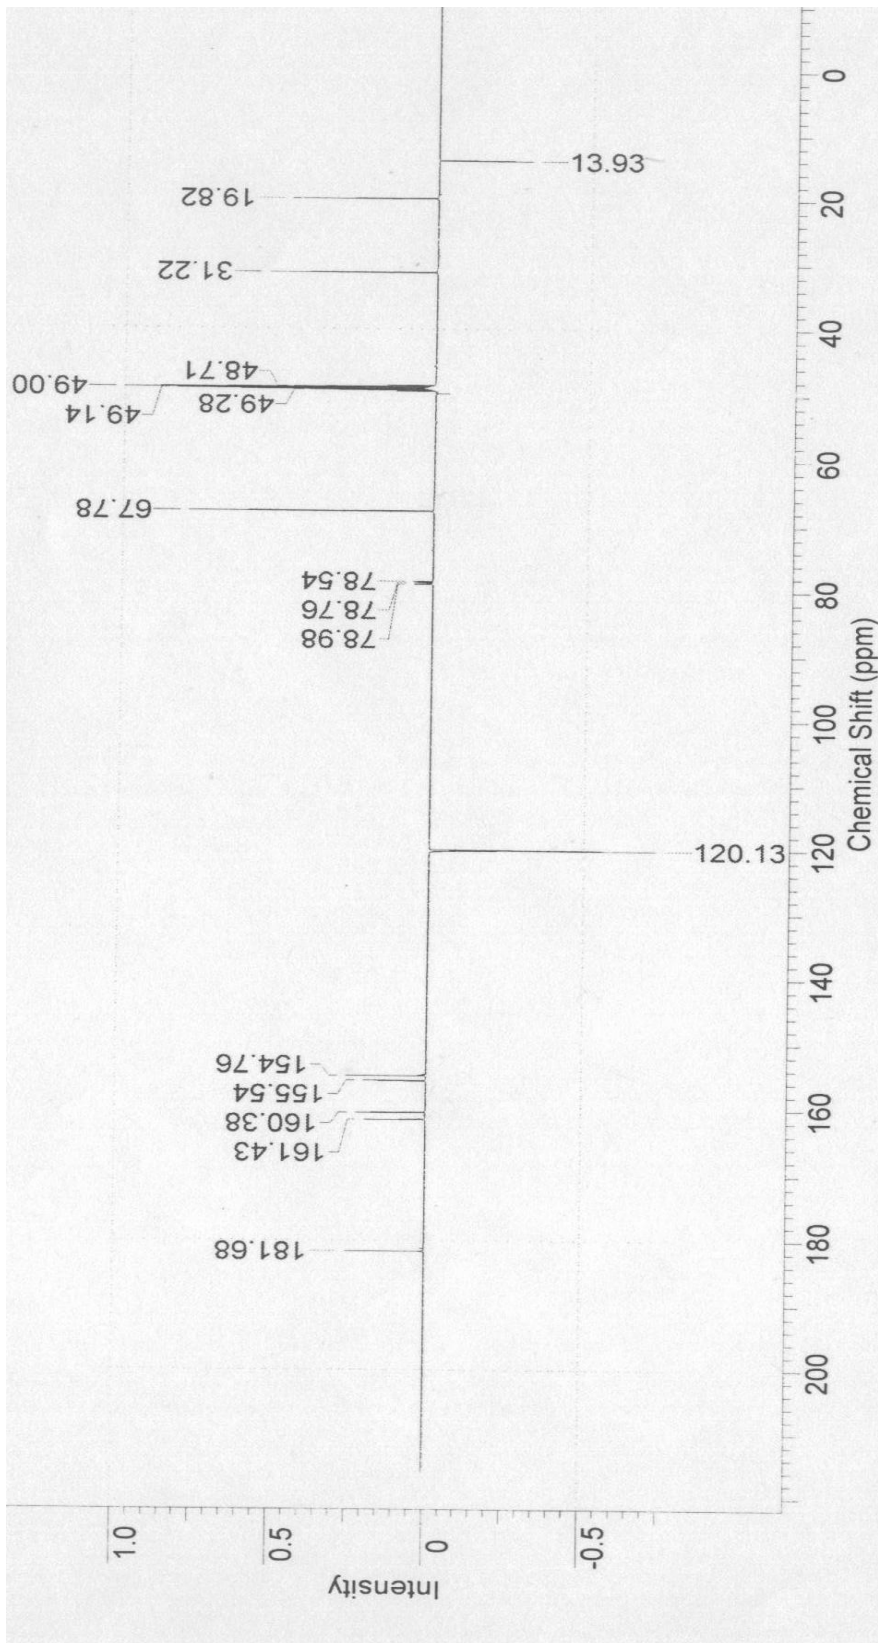

**Figure 4S.**  $^{13}\text{C}$  NMR ( $\text{CD}_3\text{OD}$ , 150 MHz) of n-monobutyl ester of chelidonic acid (**3**)

936-246 #33 RT: 1.68 AV: 1 NL: 3.59E6  
T: + c EI Full ms [32.50-300.50]

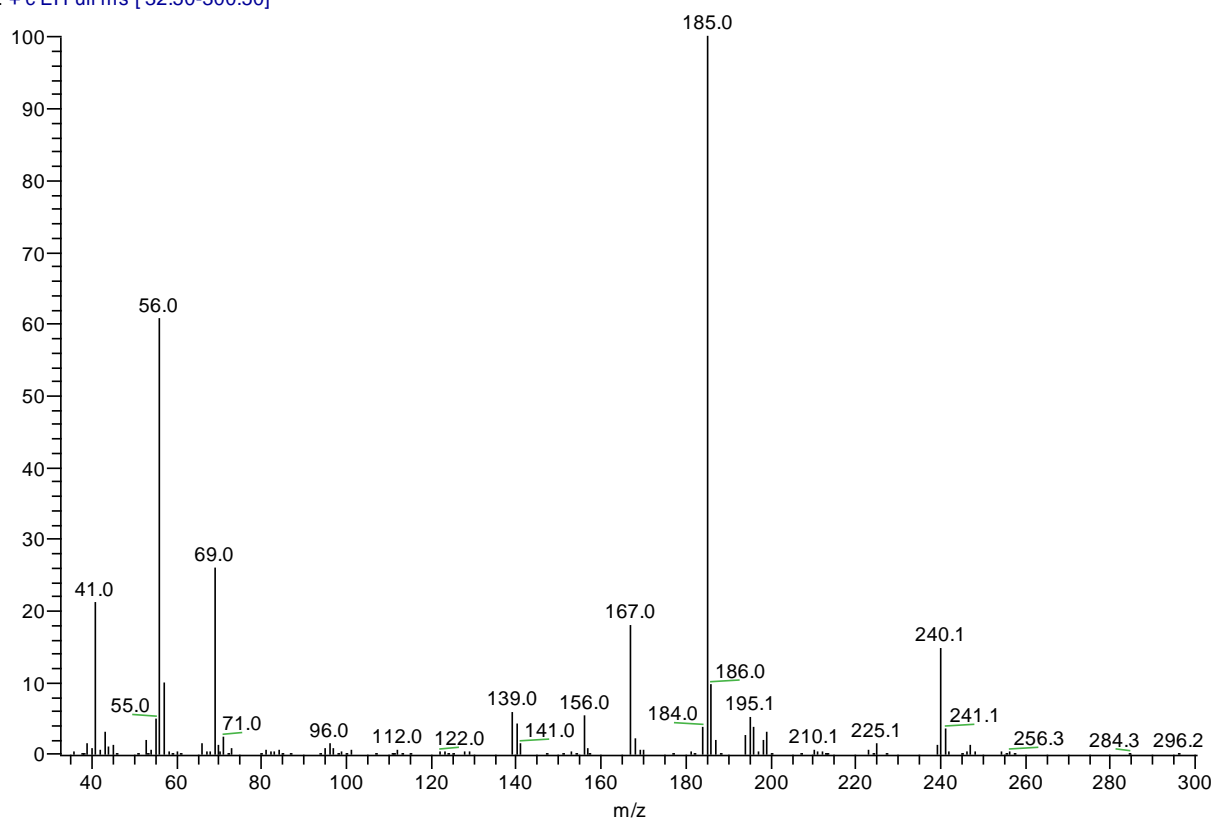

**Figure 5S.** MS-spectrum of n-monobutyl ester of chelidonic acid (**3**)

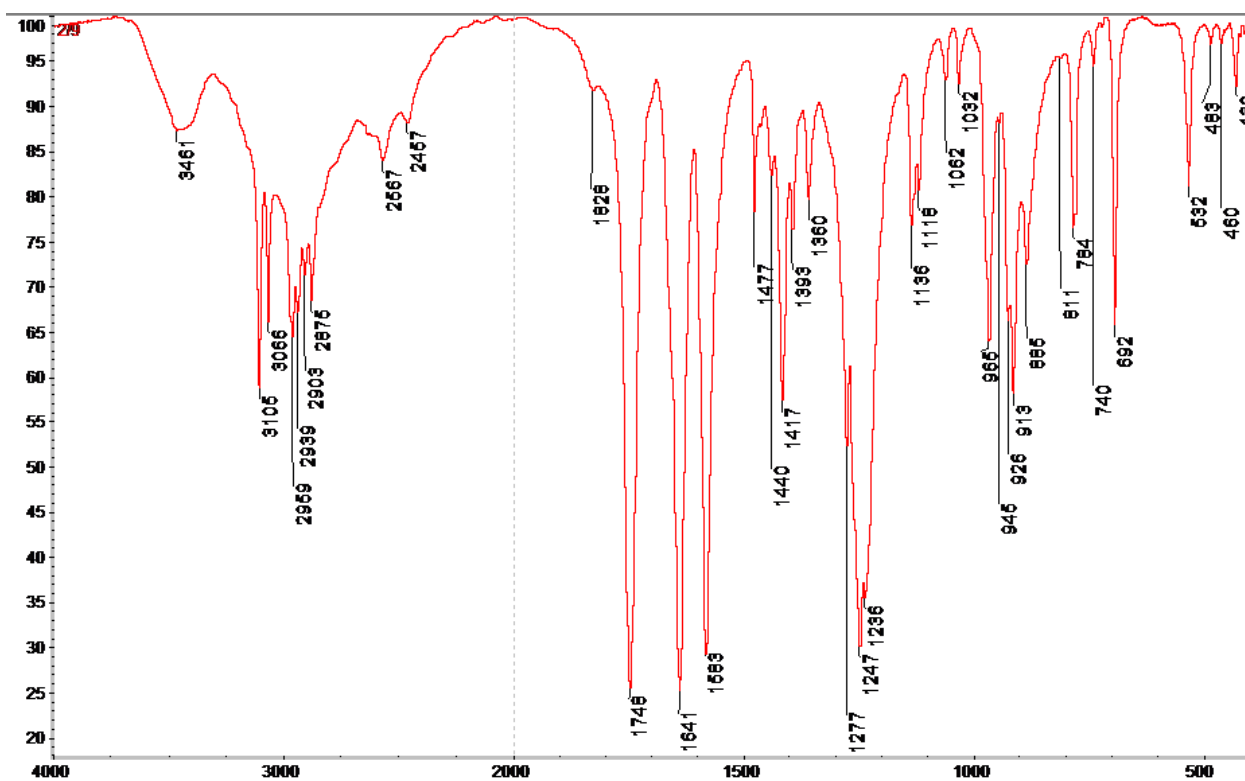

Figure 6S. IR-spectrum (KBr, cm<sup>-1</sup>) of n-monobutyl ester of chelidonic acid (3)

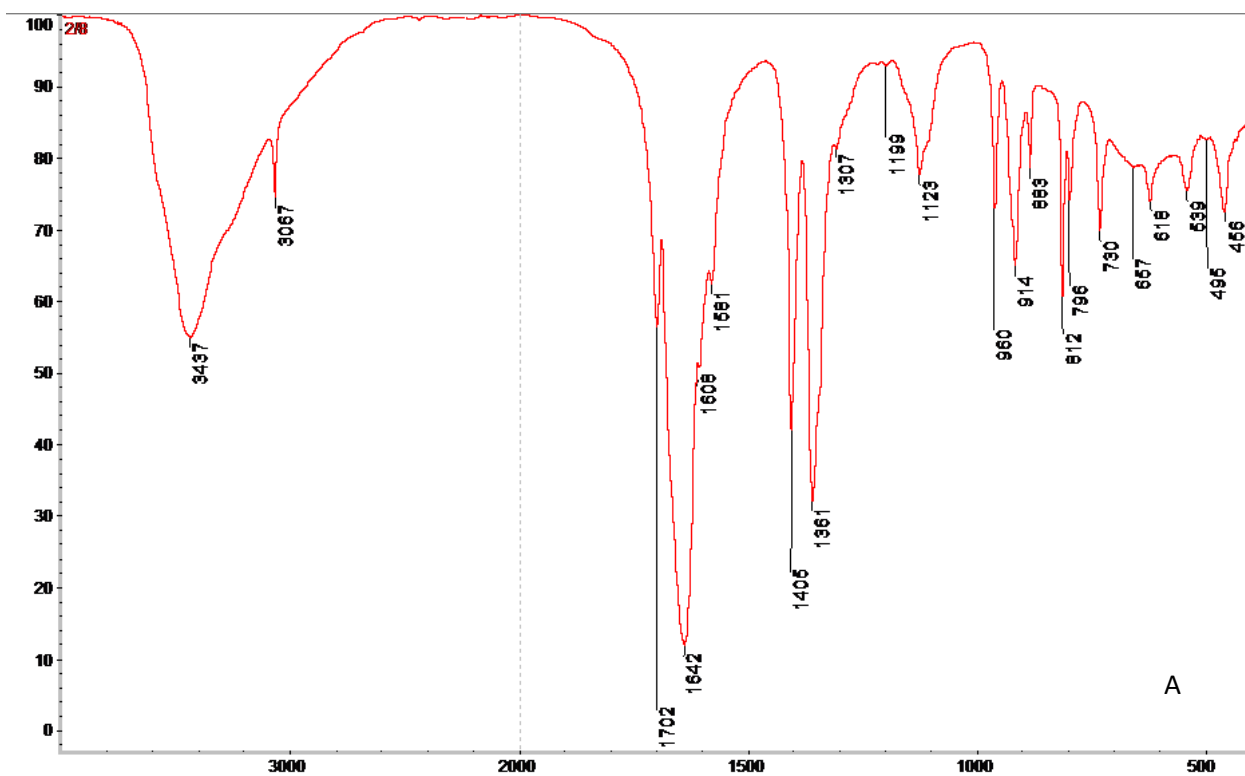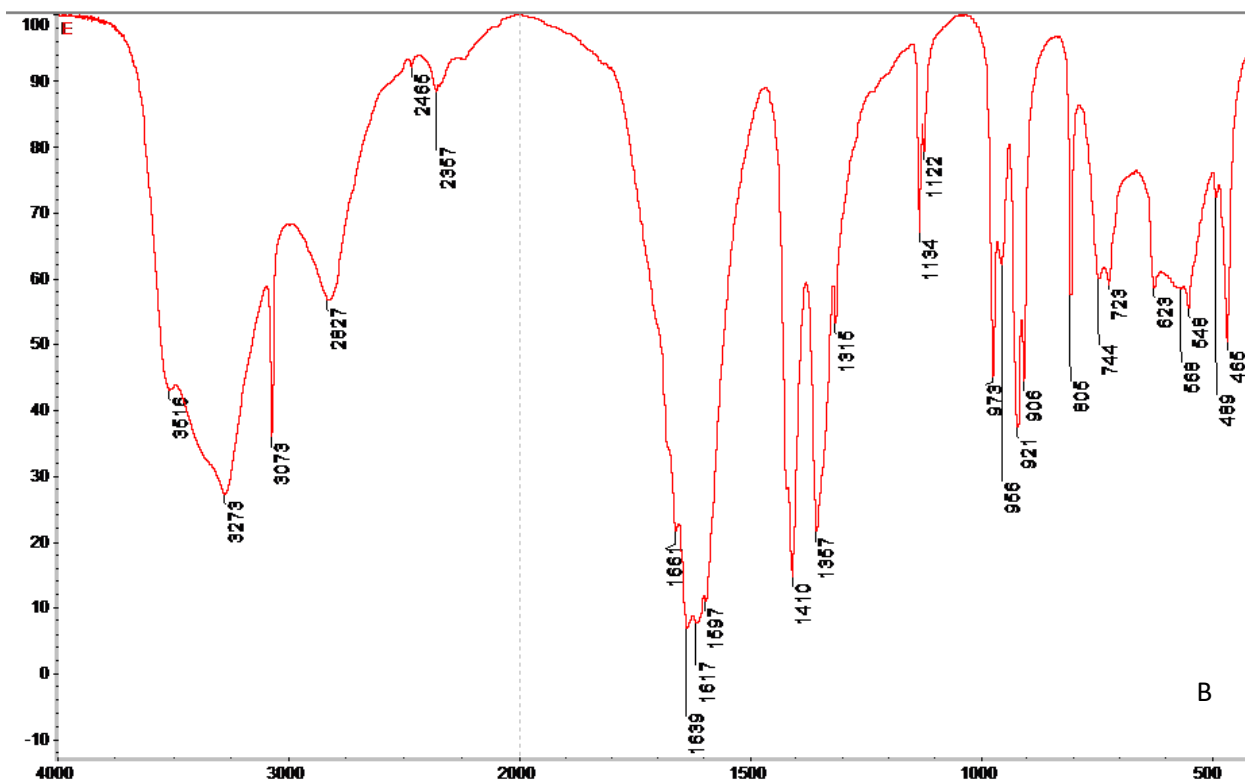

Figure 7S. IR-spectrum (KBr, cm<sup>-1</sup>) of chelidonic acid 1 (A) and [Ca(ChA)(H<sub>2</sub>O)<sub>3</sub>] 4 (B).
